# Supplementary figures and images for: A status report on RNAi therapeutics
Source: Springer Nature journal article supplement (doi:10.1186/1758-907x-1-14), 2010-01-01

# Singe dose screen of siRNAs

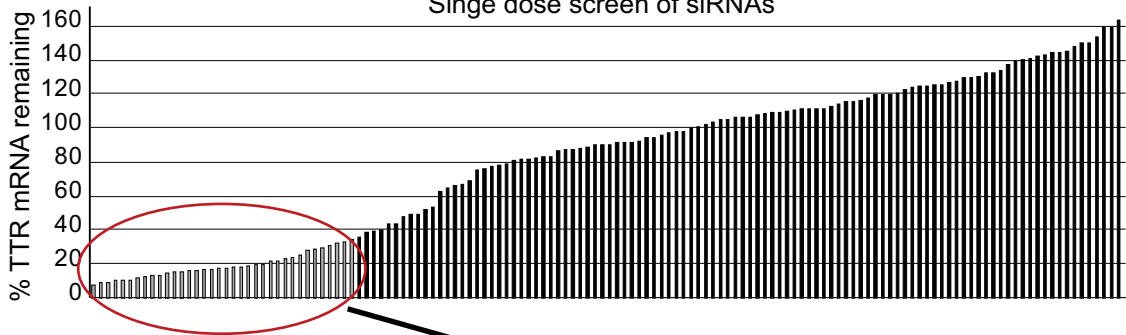

## Dose response of best candidates

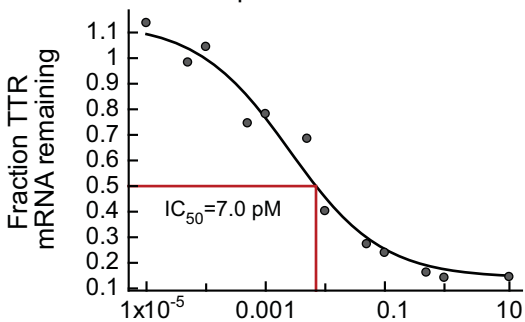

## ...versus a less efficient one

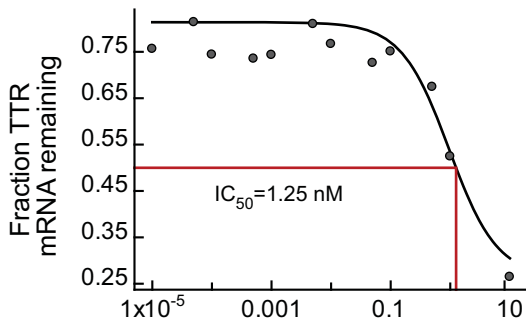

Supplement: 13101_2010_14_MOESM1_ESM.pdf [file 13101_2010_14_MOESM1_ESM.pdf]

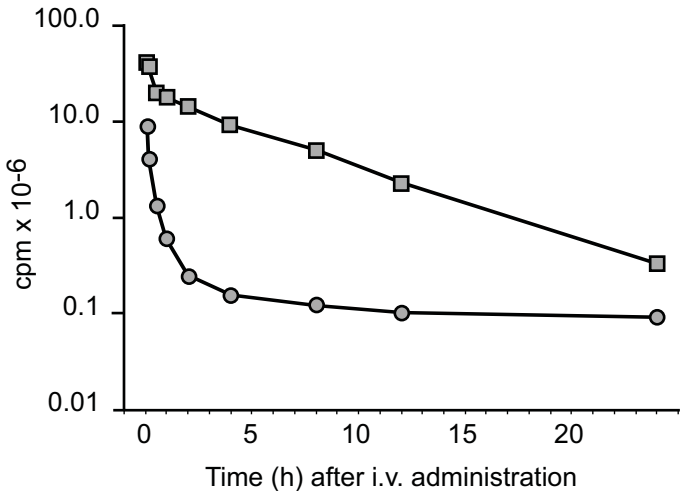

Supplement: 13101_2010_14_MOESM2_ESM.pdf [file 13101_2010_14_MOESM2_ESM.pdf]

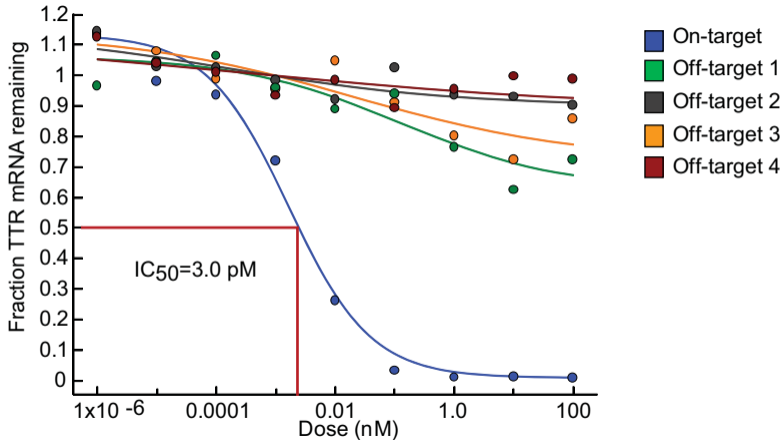

Supplement: 13101_2010_14_MOESM3_ESM.pdf [file 13101_2010_14_MOESM3_ESM.pdf]

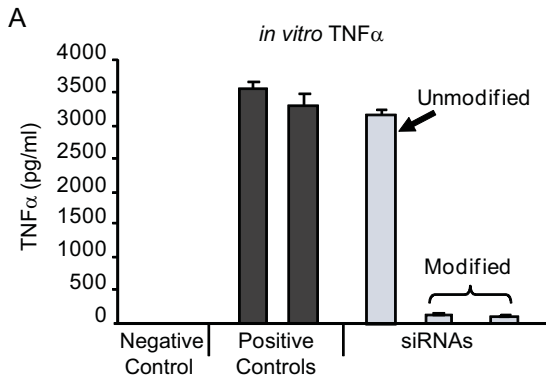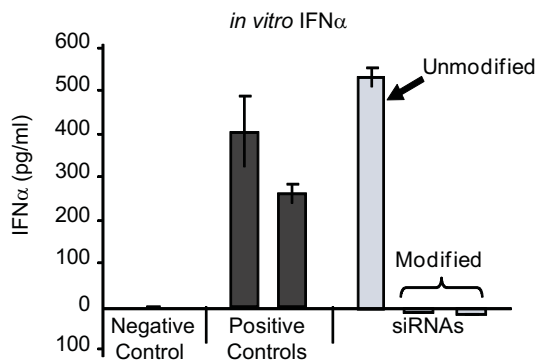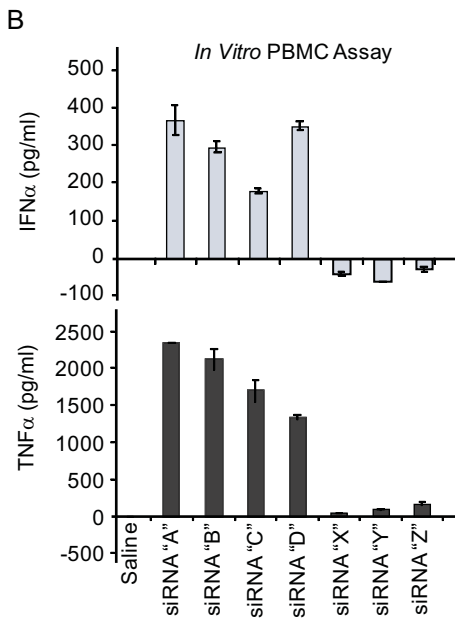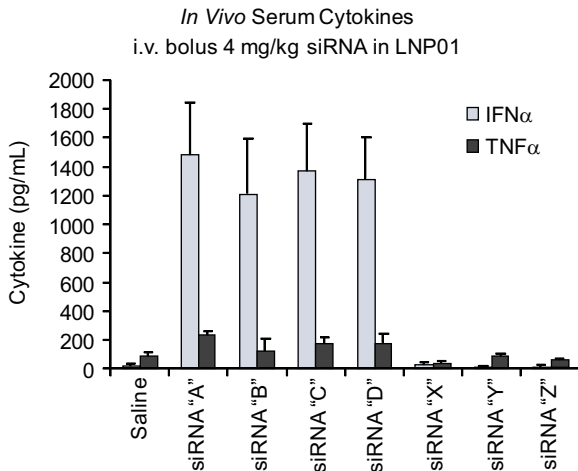

Supplement: 13101_2010_14_MOESM4_ESM.pdf [file 13101_2010_14_MOESM4_ESM.pdf]
